# Supplementary material
Source: Research Square preprint supplement (doi:10.21203/rs.3.rs-9227497/v1)

**Appendix figure 2: Screening rates during and post implementation support**

Implementation


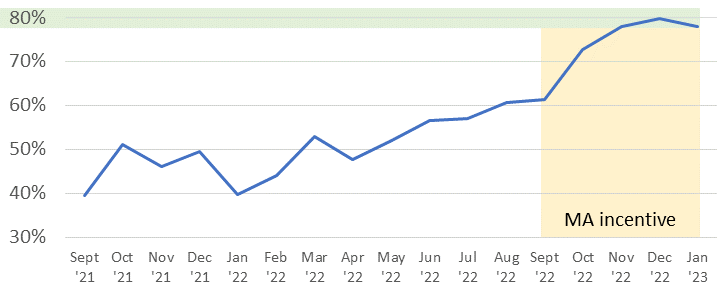


Post-implementation


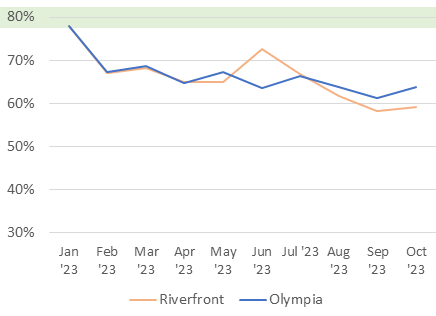

Supplement: Supplementary file 1 [file 10f895a12034ca1e5ca41aa4.docx]
