# Supplementary material
Source: Research Square preprint supplement (doi:10.21203/rs.3.rs-9227497/v1)
Supplement: Supplementary file 3 [file cf3a71c4e3b6e54be569f763.docx]

**Appendix table 1: Implementation goals, activities, and descriptions**

| Goal | Activity | Description |
| --- | --- | --- |
| Develop core team work for SHI, support implementation with fidelity at scale, inform/lead evaluation | Lead all of the below | All of the below activities are led by the core team who interfaces with the delivery system, sponsors, patients. The core team tracks timelines, tasks, and follows through on deliverables. The core team schedules all meetings, tracks decisions, action items, and ensures that all team members have what they need to execute the plan. |
| Optimizing the patient experience | Engage patient panel | Train up the patients to meaningfully engage as partners across entire project (even informing evaluation question). Engage in monthly meetings with possible between-meeting work. Examples of focus include: Work with patients through each piece of the core work to elicit their feedback that can inform workflows. Check their perceptions around universal screening, when to best do that, how to frame it. Also illuminate patient concerns about having this data in the EHR (purposefully sample from CRS patient sample those who thought it NOT acceptable to screen for SDoH). |
| Clarify patient flow through Social Health Care (SHC) | Diagram patient flow through IT and other core work | Diagram the patient flow through the various aspects of SHC. E.g., mock up low complexity patient based on pre-screen and then various paths based on new learnings on full screen (e.g., moves to high complexity using empathic inquiry) or challenges connecting with resources (as is common!), etc. Must think through all patient scenarios. Identify the gaps in current SHC IT, Thrive Local Connections, infrastructure and staffing as planned. Engage patient panel to ensure this work is exhaustive. |
| Achieve care team role clarity | Workflow development with key stakeholders | Co-design (using UX principles) workflow role clarity activity with team of key stakeholders (at least 2 of each role represented in the work) informed by high level core work completed by CMI. To inform Epic development, job aids, training, PF, etc. |
| Transition from existing paper screener to SHQ-9 in Epic | Job Aids | Mapping existing screener to SHQ-9 and Epic integration and providing example scripts for how to engage in empathic social risk screening. Ideally there is complementary training to accompany the job aids. |
| Optimizing the use of assistance referral platform | Train on assistance referral platform | Clarify who on the care team will interact with the online assistance referral platform for social needs and train on for optimal use |
| Ensure Epic affords for population management, and BOTH social risk informed AND targeted care | Epic integration | Integrate pre-screen into Epic. Partner with those leading the workflow clarification activity. Bring that design team back for “testing” with Epic. Update workbench/dashboard as needed. Carefully consider how workbench and Epic module interface. Build flags for who is due for screening. |
| Implement with fidelity | Develop system-wide metrics for social health care | Work as leadership team with sponsors to develop clear system-wide metrics that can guide tests of change until “fidelity” is reached that maps both social needs targeted (e.g., screening, link to referral, closing need) and social needs informed care (e.g., Z-codes reflect screening and problem list) |
| Standardizing and Sustaining social health care across Kaiser Permanente Washington (KPWA); Identifying extra support sites | Build Audit and Feedback | System must agree upon metrics that reflect key aspects of social health care, both social needs targeted and social needs informed (as above), and ensure IT supports system-wide data collection. Plan for putting these in front of clinic leaders established. |
| Standardizing Social Health Care Across pilot clinics | Practice Facilitation | Full practice facilitation including developing an implementation team, hosting a 2-hour kick off, having 60-min weekly team meetings, testing change and tracking system-driven metrics, with up to 6-month commitment. Partial PF may be possible based on audit and feedback, which would include same structure but be approximately 3-month commitment |
| Develop best practices for social risk informed care | Literature review, interviews/observations with high performers, expert consensus | Learn from literature, high performers, and content experts best practices for how to engage in social risk informed care |
| Ensuring providers know how to engage in social risk informed care | Training | CME for how to engage in social risk informed care + understanding the workflow of social risk targeted care and how to integrate into care plan |
| Elevating & De-Stigmatizing Social Health; Embedding SHC in our culture | Patient and Care Team Dissemination Campaign | Develop a dissemination campaign using social marketing principles (audience segmentation) to elevate social health, directly address issues of stigma, and support embedding SHC into our culture. Include patient and care team testimonials from CRS work. |
| Making meaningful connections with CBOs & ensuring their capacity and effectiveness | Outreach | Task force (primarily of CRS’) to do concerted outreach with key CBOs across the region regarding Thrive Local; RA team member to conduct interview to understand funding needs and limitations that could inform community benefit $ investment or focus for GH Foundation $ |
